# Supplementary material for: The Expression of NOX From Synthetic Promoters Reveals an Important Role of the Redox Status in Regulating Secondary Metabolism of Saccharopolyspora erythraea
Source: Front Bioeng Biotechnol. 2020 Jul 17;8:818. doi: 10.3389/fbioe.2020.00818 (PMC7379104; doi:10.3389/fbioe.2020.00818)
Supplement: TABLE S1 — Sequences of promoters. [file Table_2.XLSX]

## Sheet: S1_SPL sequences
Promoter	Sequence (5'-3')					Type	Note
	upstream	-35	spacer	-10	downstrem
ermP1 of ermEp*	GCTAGCCGCGGTCGATC	TTGACG	GCTGGCGAGAGGTGCGGG	GAGGAT	CTGACC
ermP2 of ermEp*	GACGCGGTCCACACGTGGCACCGCGATGCTGTTGTG	GGCACA	ATCGTGCCGGTTGG	TAGGAT	CCAGCG
W3	TTGGTTCTGCACATTGACACA	TTGAGC	CATTTTTGGTTTCACAG	TTTTGT	GTTCT	1
SS46	TTGGTTCTGCAAGGTTATGGTGG	GAATCT	TTTAGGTGCCTGTTT	AAGGTC	ATTAG	3
2A23	TTGGTTCTGCAATAATGGAAA	TGTCAA	ACGTTGCATTGTGTTGA	TGGCGT	TCAGG	2	to drive NOX in S. erythraea
2AS8	TTGGTTCTGCAGGGCTCTAC	TTGACA	GTAATCTCTGCCCGTC	TAAGGT	ATG	1
2AS10	TTGGTTCTGCAGAGCAAATA	TTGACA	GTTTTAATAAGTACGT	TAAGGT	TTA	1
2AS1	TTGGTTCTGCAGACATAAAA	TTGACA	TGCTTAAACAAACTCA	TAAGGT	TGT	1
2AS6	TTGGTTCTGCAGAGACTAATTC	TGACAT	CGTTTCAGACATGGT	TAAGGT	ACATC	2
SS47	TTGGTTCTGCATAGAAACCAA	GAAACG	TGACCAAAATAATTCTT	TAGGGT	ATCTG	3
2AS5	TTGGTTCTGCAAGCGCGATGT	TGACAG	ATTTATTTCAATAGT	TAAGGT	CAG	2
SS42	TTGGTTCTGCATCTAGGTGTA	GAAACG	ATTATTTCTCTTGTAAG	TAGGGT	ATAGT	3
D1W12	TTGGTTCTGCAGATCTGCGTT	TTGATG	TGTGCACTCGCATTAGG	TGCGAT	CCAAG	1	to drive NOX in S. erythraea
SSL17	TTGGTTGTGCATCCTGACAAA	TTAGGA	TTCTTCAAGTAAAGTTG	TAGCAT	CAACG	1
SS48	TTGGTTCTGCACACGCTTTGACAA	TTATAC	CTCGGCATAGTAAAGTA	TCCGCT	GCAAC	1
SS66	TTGGTTCTGCATCTAGGTGTA	GAAACG	ATTATTTCTCTTGTAAG	TAGGGT	ATAGT	3
SS41	TTGGTTCTGCAAGTGACTAAG	GAAACG	GTGCACCATATAAAGGC	TAGGGT	TAA	3
ss26	TTGGTTCTGCAAGCCGATTAA	GAAACG	CCTTTTACATGACATCT	TAGGGT	ATGTC	3
SS58	TTGGTTCTGCAAGGTTATGGT	GGGAAT	CTTTTAGGTGCCTGTT	TAAGGT	CATTAG	3
D1W1	TTGGTTCTGCAACAAGTCATC	TTGATC	GCCTGTTTAAACAAATA	TGTTGT	GGGGC	1
SS43	TTGGTTCTGCATCACCCCACG	GAAACG	GCAACTACTTGCTCGTT	TAGGGT	GGCAC	3
X2	TTGGTTCTGCACAATGCGCAG	GAAATC	TCGTTGTAAGGGTAAGG	TGCGAT	GTTTG	3
SS55	TTGGTTCTGCATCCCCTTATG	GAAACG	TTCCTCATGGGAACAGA	TAGGGT	TCGCG	3
SS64	TTGGTTCTGCATTCTATTGGT	GAAACG	GGTCTCACTGTTGGTGT	TAGGGT	TATAG	3
SS62	TTGGTTCTGCACTGCCAAATT	GAAACG	TCTTGGCGGAATATCAG	TAGGGT	CAGTC	3
SS70	TTGGTTCTGCAAATGTGGAAA	GAAACG	AGAGCCAAGTGCAATCC	TAGGGT	GGTCT	3
SS40	TTGGTTCTGCATCGTACCTTT	GAAACG	TACGAAAAGCGGCTTGT	TAGGGT	TTATA	3
Z2	TGGTTCTGCACCCTATTGAGT	TGAGTT	TGATCATGGAAATAAA	TCCTGT	AATTA	2
E4W10	TTGGTTCTGCATTATTACTTT	ACCAAG	ATGACCCGGTCAGTACG	TCAATT	GTAGT	4
Y10	TGGTTCTGCATACGTTAAGT	ACCAAG	TCGTTATTAAGTTAGTC	TGCAGT	CATGC	4
SS68	TTGGTTCTGCAAATGTGGAAA	GAAACG	AGAGCCAAGTGCAATCC	TAGGGT	GGTCT	3
SS30	TTGGTTCTGCATAGGATTCTA	GAAACG	TATAGAAGATATGTAAG	TAGGGT	TTAAA	3
SS54	TTGGTTCTGCAGTTCCTCTTC	GAAACG	CACCACCTCTGTATTTG	TAGGGT	GGCGT	3
SS69	TTGGTTCTGCATCCCCTTATG	GAAACG	TTCCTCATGGGAACAGA	TAGGGT	TCGCG	3
2A27	TTGGTTCGGCAGTAATGGTGA	TGTGCA	TACGTCTGCTTTGCTGT	TGATGG	CGTGT	2
E4W4	TTGGTTCTGCATCGTAAGCTG	ACCAAG	TTTGTTACTGCTCTGGT	TGTCAT	TATAA	4
X4	TTGGTTCTGCATACGTTAAGT	ACCAAG	TCGTTATTAAGTTAGTC	TGCAGT	CATGC	4
D1W10	TTGGTTCTGCATTCTTCGCAG	TTGACTT	CATTCTTTTCTTCAGA	TAACTT	GCCTA	1
Y11	TTGGTTCTGCATACGTTAAGT	ACCAAG	TAGTTATTAAGTTAGTC	TGCAGT	CATGC	4
A3M20	TTGGTTCTGCAAACTGACACA	GAAATC	TTTGGGAACTTATTCTT	TAAGCT	CGCGG	3
B3W4	TTGGTTCTGCAACGAATGGTT	GAAAAC	AAGGTGGGAAGCCGCGT	TCCTGT	TGTAG	3

## Sheet: S2_DEGs
Genes up-regulated in A2N				Genes down-regulated in A2N
Categary	Gene locus	Function or encoding product		Categary	Gene locus	Function or encoding product
Carbohydrate metabolism and transport	SACE_1658	α-amylase		Carbohydrate metabolism and transport	SACE_2271	phosphoenolpyruvate--protein phosphotransferase CDS
	SACE_1663	exo-α-sialidase			SACE_2273	pfkB CDS, 6-phosphofructokinase
	SACE_1666	sugar ABC transporter substrate-binding protein			SACE_2274	PTS fructose transporter subunit IIA CDS
	SACE_1668	α-glucosidase			SACE_2275	PTS fructose transporter subunit IIBC CDS
DNA replication and repair	SACE_0327	dnaN CDS, DNA polymerase III subunit beta			SACE_2276	HPr family phosphocarrier protein CDS
	SACE_0911	ATP-dependent DNA ligase CDS			SACE_2277	glycoside hydrolase family 32 protein CDS
	SACE_1730	ATP-dependent helicase CDS			SACE_3591	MSMEG 4193 family putative phosphomutase CDS
	SACE_1760	transcriptional repressor LexA CDS			SACE_6077	sugar porter family MFS transporter CDS
	SACE_2037	radical SAM protein CDS		Others	SACE_4672	mmsA CDS
	SACE_2073	methylated-DNA--[protein]-cysteine S-methyltransferase CDS			SACE_4673	aspartate aminotransferase family protein CDS
	SACE_4506	transposase CDS			SACE_6065	DUF882 domain-containing protein CDS
	SACE_6024	methylated-DNA--[protein]-cysteine S-methyltransferase CDS			SACE_6088	kdpB CDS, potassium-transporting ATPase subunit B
	SACE_6660	error-prone DNA polymerase CDS
	SACE_6661	DNA polymerase Y family protein CDS
Inorganic ion transport and metabolism	SACE_0302	catalase CDS
	SACE_1355	MFS transporter CDS, EmrB/QacA family drug resistance transporter
	SACE_1664	carbohydrate ABC transporter permease CDS
	SACE_1665	sugar ABC transporter permease CDS
	SACE_1881	sugar ABC transporter ATP-binding protein CDS
	SACE_5622	ctpD, cation-transporting P-type ATPase D
Energy production and conversion	SACE_2374	alcohol dehydrogenase AdhP CDS, NADH forming
	SACE_2386	mdo CDS, 1,3-propanediol dehydrogenase, NADH forming
	SACE_6562	aldehyde dehydrogenase CDS, NADH forming
Others	SACE_3388	Asp/Glu/hydantoin racemase CDS						Clusters of orthologous groups (COG) analysis of differentially expressed genes in A2N relative to E3. Columns indicate numbers of DEGs involved in each COG category.
	SACE_5716	LysE family translocator CDS
	SACE_5780	zinc carboxypeptidase CDS
	SACE_3389	NCS1 family nucleobase:cation symporter-1 CDS
	SACE_5670	aspartate aminotransferase family protein CDS
	SACE_3515	glutaconate CoA-transferase subunit B CDS
	SACE_3516	glutaconate CoA-transferase subunit A CDS
	SACE_1408	AraC family transcriptional regulator CDS
	SACE_1667	LacI family transcriptional regulator CDS
	SACE_1830	AraC family transcriptional regulator CDS
	SACE_5838	WYL domain-containing protein CDS
	SACE_0327	dnaN CDS, DNA polymerase III subunit beta
	SACE_0911	ATP-dependent DNA ligase CDS
	SACE_1730	ATP-dependent helicase CDS
	SACE_1760	transcriptional repressor LexA CDS
	SACE_2037	radical SAM protein CDS
	SACE_2073	methylated-DNA--[protein]-cysteine S-methyltransferase CDS
	SACE_4506	transposase CDS
	SACE_6024	methylated-DNA--[protein]-cysteine S-methyltransferase CDS
	SACE_6660	error-prone DNA polymerase CDS
	SACE_6661	DNA polymerase Y family protein CDS
	SACE_1223	glycosyl transferase CDS
	SACE_3301	CapA family protein CDS
	SACE_1398	protease inhibitor CDS
	SACE_6506	serine protease CDS
	SACE_1305	non-ribosomal peptide synthetase CDS
	SACE_3514	pcaH CDS
	SACE_3662	carboxylesterase CDS
	SACE_6384	ABC transporter ATP-binding protein CDS
	SACE_7156	ABC transporter ATP-binding protein CDS

## Sheet: S3_Counteraction
COG category	Locus tag	Transcription level (average RPKM value)			eggNOG HMM desc.
		E3	A2N	R3N
Energy production and conversion	SACE_7041	50.86	43.325	29.7	Cytochrome C oxidase, subunit I
	SACE_0142	400.43	327.555	217.36	cytochrome ubiquinol oxidase subunit
	SACE_4756	75.965	58.385	26.815	acetoin dehydrogenase E1 component subunit alpha, Reaction catalysed Pyruvate + [dihydrolipoyllysine-residue acetyltransferase] lipoyllysine <=> [dihydrolipoyllysine-residue acetyltransferase] S-acetyldihydrolipoyllysine + CO(2)
	SACE_4755	72.73	52.14	24.945	acetoin dehydrogenase E1 component subunit alpha, Reaction catalysed Pyruvate + [dihydrolipoyllysine-residue acetyltransferase] lipoyllysine <=> [dihydrolipoyllysine-residue acetyltransferase] S-acetyldihydrolipoyllysine + CO(2)
	SACE_4754	85.025	62.91	26.95	acetoin dehydrogenase E1 component subunit alpha, Reaction catalysed Pyruvate + [dihydrolipoyllysine-residue acetyltransferase] lipoyllysine <=> [dihydrolipoyllysine-residue acetyltransferase] S-acetyldihydrolipoyllysine + CO(2)
	SACE_2733	33.6	20.375	17.615	alcohol dehydrogenase, alcohol + NAD+ <=> an aldehyde + NADH
	SACE_4443	56.46	45.74	28.08	NAD/factor-dependent formaldehyde dehydrogenase, S-(hydroxymethyl)mycothiol + NAD(+) <=> S-formylmycothiol + NADH
	SACE_4649	33.915	23.36	19.08	2-octaprenyl-6-methoxyphenol 4-monooxygenase, With NADH or NADPH as one donor, and incorporation of one atom of oxygen
Nucleotide metabolism and transport	SACE_4525	29.42	18.075	16.47	cytosine permease
Carbohydrate metabolism and transport	SACE_4408	35.075	24.375	19.515	Major facilitator superfamily
	SACE_4581	74.76	51.395	39.095	Citrate lyase
	SACE_2271	853.265	412.365	323.795	General (non sugar-specific) component of the phosphoenolpyruvate-dependent sugar phosphotransferase system (sugar PTS). This major carbohydrate active-transport system catalyzes the phosphorylation of incoming sugar substrates concomitantly with their translocation across the cell membrane. Enzyme I transfers the phosphoryl group from phosphoenolpyruvate (PEP) to the phosphoryl carrier protein (…
	SACE_4999	50.945	35.575	23.285	Glycoside hydrolase 97
	SACE_0612	93.74	68.095	54.9	Major facilitator superfamily
Coenzyme metabolism	SACE_4646	31.12	25.385	13.435	Polyprenyl synthetase
	SACE_0569	207.125	144.55	123.865	Catalyzes, together with MoaC, the conversion of 5'-GTP to cyclic pyranopterin monophosphate (cPMP or molybdopterin precursor Z) (By similarity)
	SACE_4685	459.91	339.195	265.1	8-amino-7-oxononanoate synthase
	SACE_4684	656.5	435.135	347.195	Catalyzes the transfer of the alpha-amino group from S- adenosyl-L-methionine (SAM) to 7-keto-8-aminopelargonic acid (KAPA) to form 7,8-diaminopelargonic acid (DAPA). It is the only animotransferase known to utilize SAM as an amino donor (By similarity)
	SACE_4683	1716.53	1108.54	976.56	Catalyzes the conversion of dethiobiotin (DTB) to biotin by the insertion of a sulfur atom into dethiobiotin via a radical- based mechanism (By similarity)
Lipid metabolism	SACE_4648	27.855	22.245	14.64	Squalene--hopene cyclase
	SACE_4787	140.425	82.845	61.375	Enoyl-CoA hydratase
Tranlsation	SACE_4757	69.865	37.9	26.66	acetyltransferase
	SACE_3475	30.96	26.515	17.835	rRNA methyltransferase
Transcription	SACE_4409	109.73	89.305	65.685	Transcriptional regulator
	SACE_2272	714.56	405.265	322.83	DeoR family transcriptional regulator
	SACE_3275	106.13	74.365	53.295	LacI family transcriptional regulator
	SACE_4682	425.84	322.49	250.61	TetR family Transcriptional regulator
	SACE_4677	64.52	48.145	32.435	iclR family transcriptional regulator
	SACE_4941	99.785	62.925	43.165	Transcriptional regulator
	SACE_5028	51.735	38.93	30.355	Tet-R family transcriptional regulator
	SACE_4889	96.92	59.595	42.68	Transcriptional regulator, tetR family
	SACE_2559	39.97	30.45	21.375	TetR family Transcriptional regulator
	SACE_4948	59.485	44.175	29.485	TetR family Transcriptional regulator
Post-translational modification, protein turnover, chaperone functions	SACE_6932	116.915	82.905	68.83	cytochrome c biogenesis
	SACE_6311	83.97	56.44	33.735	FAD-dependent pyridine nucleotide-disulfide oxidoreductase
	SACE_5000	111.525	76.98	49.45	Acts as a chaperone (By similarity)
Inorganic ion transport and metabolism	SACE_4296	298.89	229.885	145.135	Monooxygenase
Secondary metabolites biosynthesis, transport and catabolism	SACE_7340	71.86	58.945	36.21	Methyltransferase
	SACE_4717	52.26	37.005	26.355	Methyltransferase
	SACE_4651	42.57	32.17	22.745	taurine dioxygenase
Function unknow	SACE_4650	103.66	83.99	49.67	O-methyltransferase, family 2
	SACE_4580	167.735	113.685	84.795	YhgE Pip N-terminal domain protein
	SACE_4579	146.245	99.19	68.395	MmpL domain-containing protein
	SACE_0829	37.155	32.765	21.81	Protein of unknown function (DUF3558)
	SACE_5584	30.21	21.325	10.86	NA
	SACE_4030	87.49	69.46	37.205	Transglycosylase-associated protein
	SACE_2511	27.855	22.975	16.635	Protein of unknown function (DUF1470)
	SACE_1553	394.25	336.265	229.46	UPF0317 protein
	SACE_7339	39.145	32.155	23.27	Methyltransferase
	SACE_4303	76.305	49.835	44.43	NA
	SACE_4753	38.38	28.345	9.585	ATP-NAD AcoX kinase
	SACE_6310	117.655	80.02	43.09	Methyltransferase type 12
	SACE_4949	176.02	140.045	73.72	Short-chain dehydrogenase reductase SDR
	SACE_4444	28.075	20.195	13.08	Protein of unknown function (DUF1232)
	SACE_3245	27.085	19.08	16.065	membrane-flanked domain protein
Signal transduction	SACE_4404	46.57	31.36	24.17	PAS PAC sensor protein
Others	SACE_3523	59	49.94	35.275
	SACE_4423	49.77	36.19	22.22
	SACE_4393	37.735	25.89	22.175
	SACE_4372	101.97	75.56	45.79
	SACE_5589	70.185	50.935	41.2
	SACE_5548	37.395	26.12	20.515
	SACE_0147	56.155	46.705	27.57
	SACE_1547	62.675	50.67	37.305
	SACE_4297	192.815	132.81	92.245
	SACE_2982	420.71	333.75	235.58
	SACE_4987	52.555	38.36	23.975
	SACE_4157	30.02	20.3	12.815
	SACE_5001	62.355	34.76	26.3
	SACE_4950	64.365	53.67	28.8

## Sheet: S4_c-di-GMP genes
Genes coding for diguanylate cyclase							Genes coding for phosphodiesterases
Locus tag	Transcription level (average RPKM value)						Locus tag	Transcription level (average RPKM value)
	E3	A2N	R3N					E3	A2N	R3N
SACE_0097	43.56	46.31	34.84				SACE_0052	4.865	5.1	4.67
SACE_0749	53.33	56.87	49.3				SACE_0097	43.56	46.305	34.84
SACE_2003	39.03	39.02	36.82				SACE_0126	18.695	20.52	14.745
SACE_3161	3.84	4.56	3.41				SACE_0175	23.01	21.81	18.95
SACE_3289	37.15	30.64	25.62				SACE_0237	13.035	13.025	10.54
SACE_4887	1.91	2.27	0.84				SACE_0382	20.42	19.63	19.06
SACE_6414	122.35	127.95	101.12				SACE_1400	1.445	2.56	1.265
SACE_7088	127.16	125.21	100.15				SACE_2003	39.025	39.02	36.82
SACE_7137	22.86	22.8	17.41				SACE_2292	56.98	50.925	58.175
							SACE_2998	0.52	0.795	0.76
							SACE_3259	52.525	47.72	35.31
							SACE_3361	9.84	10.005	9.735
							SACE_4887	1.905	2.27	0.84
							SACE_4968	0.675	0.595	0.745
							SACE_5916	51.805	51.775	46.23
							SACE_6355	3.77	3.775	3.83
							SACE_6368	39.16	40.595	30.58
							SACE_6716	4.395	5.425	3.685
							SACE_6720	3.425	3.6	2.745
							SACE_7137	22.855	22.8	17.405
							SACE_7169	81.915	73.68	81.015
